# Supplementary material
Source: PubMed Central journal article supplement (PMC3536075)
Supplement: AEM.02536-12_zam999103993so1.pdf [file AEM.02536-12_zam999103993so1.pdf]

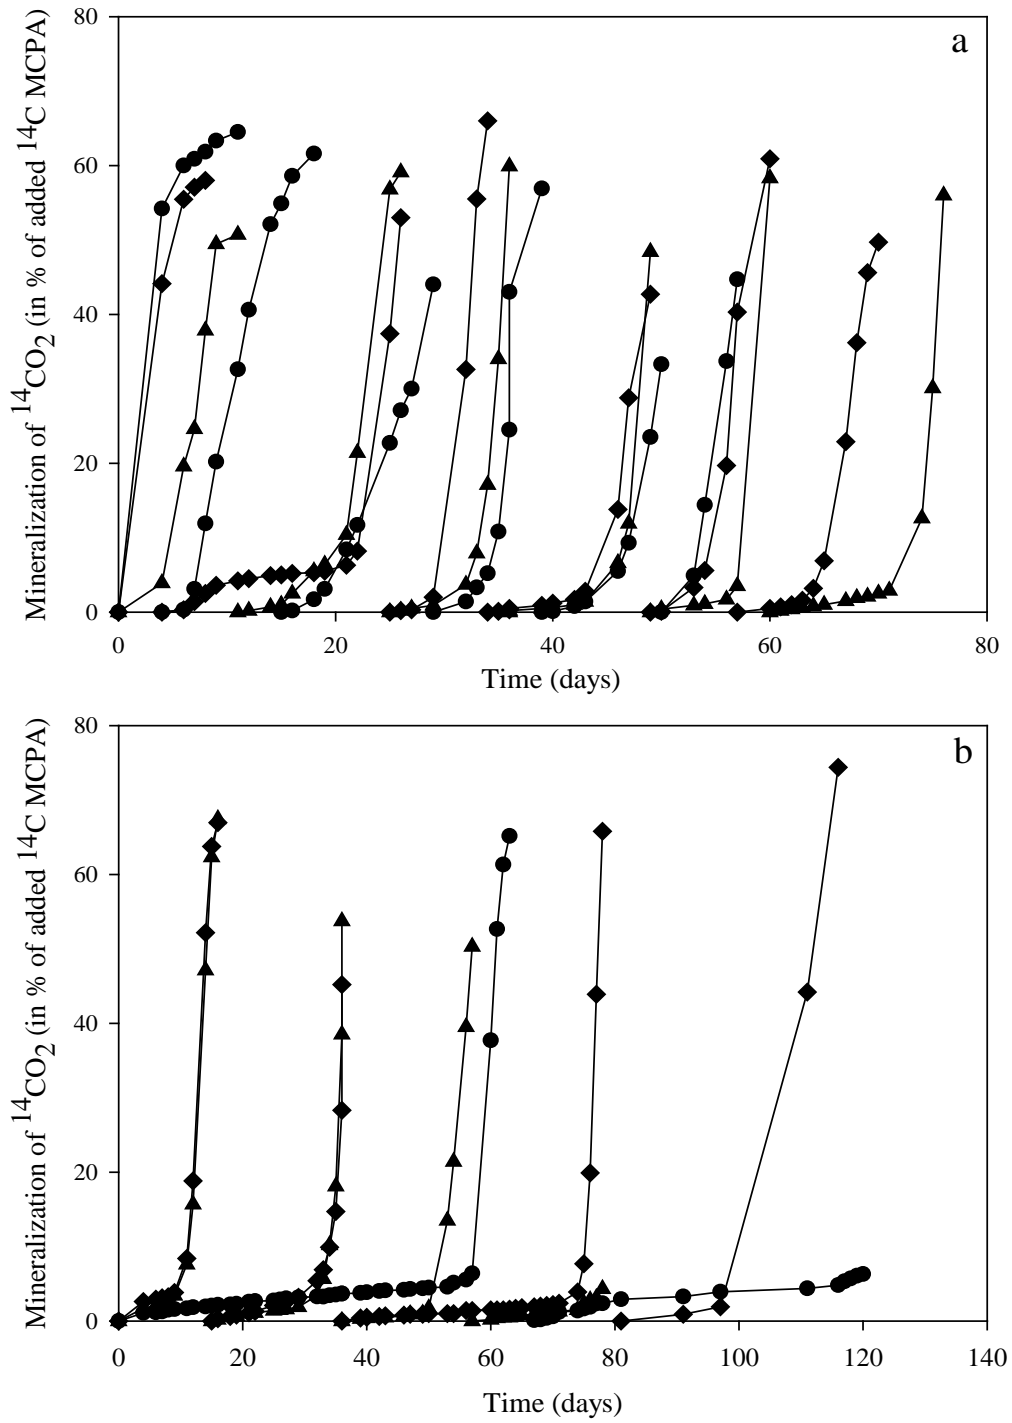

**Figure S1.** Mineralization of  $^{14}\text{C}$ -ring labeled MCPA ( $0.1 \text{ mg L}^{-1}$ ) (a) ( $25 \text{ mg L}^{-1}$ ) (b) to  $\text{CO}_2$  in successive enrichments. Different symbols represent different subcultures.
