# Supplementary material
Source: PubMed Central journal article supplement (PMC3536075)
Supplement: AEM.02536-12_zam999103993so2.pdf [file AEM.02536-12_zam999103993so2.pdf]

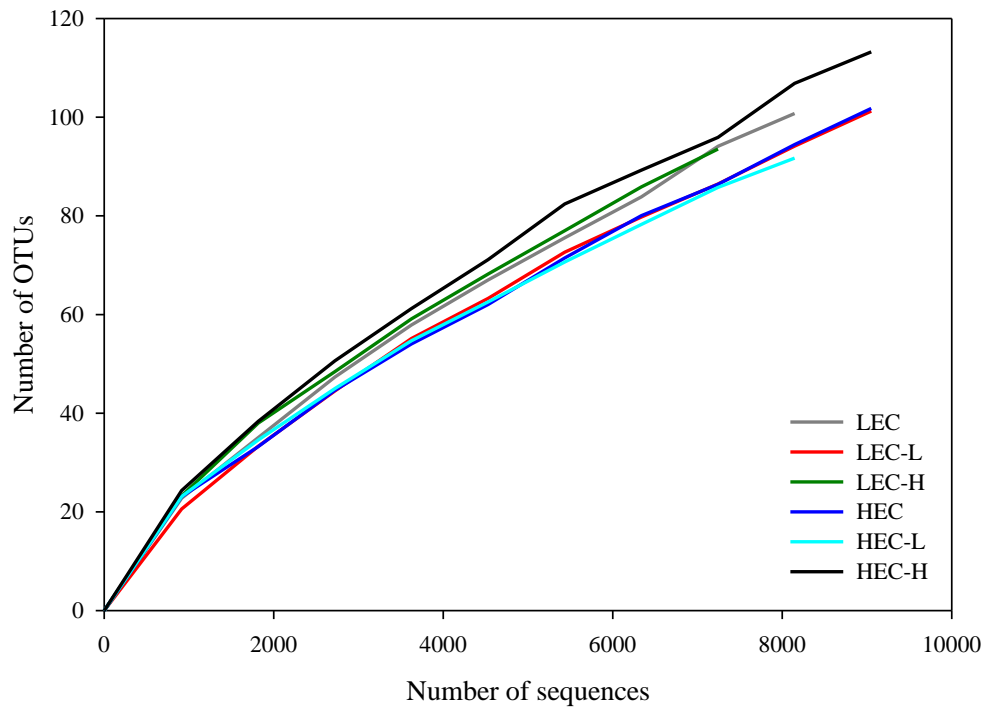

**Figure S2.** Rarefaction curves representing the relation between the number of sequences and the number of operational taxonomic units (OTUs) identified. The sequences were clustered and OTUs defined by 97% sequence identity using UCLUST, and reference sequences were picked using scripts in QIIME.
